# Supplementary material for: Studying the Changes in the Pressure Transmission Coefficient of the Ultrasonic Waves for Ferrous and Non-Ferromagnetic Alloys to Find Some of the Most Significant Mechanical Properties
Source: Research Square preprint supplement (doi:10.21203/rs.3.rs-5695324/v1), 2025-04-17
Supplement: Supplementary file 1 [file 2dd031123cc1890da1a6469e.xlsx]

## Sheet: Sheet1
Met-al Na-me	CL	ρ	Es (GPa)	Z (Kg/m2 s) *106	ES×ρ GPa. kg/m3	PTC	E (Gpa)	APPE % for Modulus of Elasticity	Cryatal	Yield Stress SPRINGER	Calculated Yield Stress	APPYS % for Yield stress	Ultemit Stress	Calculated	APPUT%
		(kg/m3)					Calculated		Structur	Stress	Yield			Ultimat	ULT
			[ASTM]						Typ		Stress				Stress
	[ASTM]	[ASTM]
AL1199-O	6320	2710	62	17.1272	168020	1.3536	68.1363	90.1028	FCC	12	14.0142	83.2152	45	48.7877	91.5829
AL(1100-O)	6350	2710	69	17.2085	186990	1.35006	74.2016	92.4614	FCC	25	28.598	85.6078	75	75.3346	99.5539
AL(2014-O)	6310	2760	73	17.4156	201480	1.34113	87.3443	80.3503	FCC	96.5	61.0007	63.2131	184	131.757	71.607
Ge	5450	5470	140	29.8115	765800	0.954783	163.139	83.472	FCC	130	130.626	99.5182	150	158.394	94.4039
Thorium	2850	11720	72	33.402	843840	0.880287	57.5967	79.9955	FCC	144	144.251	99.8254	217	203.833	93.9324
Cu (C10200) &Cu(C10100)	4660	8941	130	41.6651	1162330	0.74579	136.856	94.7259	FCC	145	144.5	99.6553	280	285.549	98.0183
COPPER C10100	4671	8960	130	41.8522	1164800	0.743213	138.618	93.3705	FCC	150	144.375	96.2503	260	288.069	89.2041
NI 233	5515	8890	199	49.0284	1769110	0.656145	218.785	90.0579	FCC	150	144.777	96.5181	400	407.547	98.1133
Ni 200	5600	8890	199	49.784	1769110	0.648141	226.509	86.1764	FCC	148	145.528	98.3299	462	421.553	91.2452
Ni	5631	8902	199	50.1272	1771498	0.644569	229.646	84.6001	FCC	155	145.913	94.1371	462	427.922	92.6237
Rh	6190	12410	379	76.8179	4703390	0.450904	371	97.8892	FCC	200	199.916	99.9581	700	699.907	99.9867
Ir	5380	22650	528	121.857	11959200	0.298975	443	83.9015	FCC	234	233.968	99.9862	1000	999.673	99.9673
Nb	3480	8570	104	29.8236	891280	0.954512	103.93	99.9328	BCC	105	101.627	96.7872	195	183.322	94.0113
Cast Iron	4600	7200	100	33.12	720000	0.885723	93.8265	93.8265	BCC	128.39	135.002	94.8502	252	257.898	97.6596
V (hardned)	6000	6160	127	36.96	782320	0.816937	132.364	95.7762	BCC	150	158.068	94.6212	200	207.098	96.451
Fe	5900	7800	196	46.02	1528800	0.690057	212.518	91.5725	BCC	131	141.299	92.1383	689	147.334	21.3837
Chromium	6850	7190	279	49.2515	2006010	0.653761	273.358	97.9777	BCC	131	131.203	99.8447	415	172.908	41.6647
Ta	3400	16654	185	56.6236	3080990	0.583641	153.259	82.8428	BCC	172	178.368	96.2977	285	278.012	97.548
Uranium	3370	18950	177	63.8615	3354150	0.527974	155.734	87.9851	BCC	220	299.646	63.7974	380	395.322	95.9679
Mo	6370	10220	325	65.1014	3321500	0.519481	293.825	90.4078	BCC	345	322.817	93.5701	435	414.125	95.2012
W	5180	19300	411	99.974	7932300	0.357528	407	99.0268	BCC	550	550.516	99.9062	620	624.588	99.2599
Mg2	5780	1743.47	45	10.0773	78456.1	1.7319	41	91.1111	HCP	69	70.2244	98.2256	176	177.663	99.0552
Mg-0.5Zr	5790	1740	45	10.0746	78300	1.73207	41	91.1111	HCP	55	70.2419	72.2875	180	177.831	98.7948
Berylium	12600	1850	318	23.31	588300	1.12623	282.786	88.9266	HCP	130	145.891	87.7764	450	365.728	81.2729
Ti	6100	4450	120	27.145	534000	1.01857	122.689	97.759	HCP	140	131.519	93.942	235	380.209	38.2091
Zr	4262	6506	97	27.7286	631082	1.00392	89.7	92.4742	HCP	207	146.576	70.8098	379	380.23	99.6754
Hf	3000	13310	141	39.93	1876710	0.770555	136	96.4539	HCP	230	229.854	99	445	444.973	99.994
Colt	5730	8900	211	50.997	1877900	0.635689	200	94.7867	HCP	758	707.007	93.2727	800	775.785	96.9731
STAINLESS 308	5250	8000	193	42	1544000	0.741189	157	81.34		170	179.057	94.6725	515	459.496	89.2225
STAINLESS 302	5639	8000	193	45.112	1544000	0.700986	195.9	98.4974		205	213	96.0975	515	542.51	94.6582
steel 330	5660	8000	193	45.28	1544000	0.698938	200	96.37		260	215.923	83.0474	515	546.118	93.9576
STAINLESS 303	5710	8000	193	45.68	1544000	0.69411	203	94.8187		215	223.608	95.9962	550	555.596	98.9825
STAINLESS 316	5740	8000	193	45.92	1544000	0.691244	205.9	93.3161		225	228.72	98.3468	575	561.972	97.7343
STAINLESS 304	5801	8000	193	46.408	1544000	0.68549	212	90.1554		270	240.285	88.9943	600	576.752	96.1253
STEEL A-235	5913	7850	193	46.4171	1515050	0.685384	216	88.0829		275	240.514	87.4596	620	577.05	93.0726
STAINLESS STEEL 205	6600	7800	197	51.48	1536600	0.630862	248	74.1117		450	435.663	96.8141	790	878.96	88.7392
STAINLESS STEEL 20Cb-3	6200	8080	195	50.096	1575600	0.644892	249	72.3077		366	372.273	98.2861	790	773.994	97.974
STEEL 201	7000	7800	193	54.6	1505400	0.601355	210	91.1917		520	585.549	87.3945	1200	1135.53	94.6271
STEEL 310	7200	8000	193	57.6	1544000	0.575459	216	88.0829		810	721.544	89.0795	1280	1364.78	93.3768
Stainless steel 405	5690	7800	200	44.382	1560000	0.710024	191	95.5		170	192.941	86.5053	415	436.838	94.7377
Stainless steel 409	5820	7612	200	44.3018	1522400	0.71103	195	97.5		207	183.799	88.7917	450	426.445	94.7656
Stainless steel 436	5800	7800	200	45.24	1560000	0.699425	202	99		365	337.279	92.4053	530	586.322	89.3732
Stainless steel 44LN	5900	7800	200	46.02	1560000	0.690057	221	89.5		450	537.922	80.4617	690	779.302	87.0577
STAINLESS 410 cb	6010	7800	194	46.878	1513200	0.680036	232	80.4124		800	828.482	96.4397	1000	1048.98	95.102
Stainless steel 450	6050	7800	204	47.19	1591200	0.676464	227	88.7		1000	951.054	95.1054	1300	1160.94	89.3028
STAINLESS 440 A	6200	7800	204	48.36	1591200	0.663391	210	97.0588		1500	1484.57	98.9713	1790	1641.4	91.6985
stainless steel 440C	6250	7800	204	48.75	1591200	0.659144	246	80		1700	1686.63	99.2137	1900	1821.43	95.8648
2H	5046	7500		37.845		0.80255				285	284.418	99.7958	340	385.49	86.6207
4 F	5000	7750	140	38.75	1085000	0.788346	133	95		315	292.862	92.9719	525	505.622	96.309
9 D old	5789	7750	154	44.8648	1193500	0.704021	184	80.5195		410	384.545	93.7914	611	556.566	91.091
STEEL 4340	5850	7800	192	45.63	1497600	0.69471	207	92.1875		470	415.065	88.3116	745	651.535	87.4544
Steel 1020	5892	7750	205	45.663	1588750	0.694314	209	98.1		355	417.811	82.3067	690	656.986	95.2154
8 G	5955	7750	170	46.1512	1317500	0.688505	158	92.9412		434	475.612	90.4121	703	752.312	92.9855
STEEL CARBON	5931	7850	200	46.5583	1570000	0.683736	217.8	91.1		490	551.898	87.3678	750	854.387	86.0817
steel 5120	6100	7750	201	47.275	1557750	0.675497	229	86.0697		786	761.791	96.92	986	1089.86	89.4666
steel 8630	6150	7750	201	47.66	1557750	0.671123	234	83.5821		979	922.176	94.1957	1117	1249.61	88.1278
steel 9261	6250	7750	205	48.4375	1588750	0.662542	243	81.4		1558	1359.09	87.2328	1800	1644.34	91.3522
STEEL 1018 (Steel)	5912	7870	205	46.5274	1613350	0.684096	216	94.6		370	545.105	52.6744	440	845.87	7.75679
steel 8620	5842	7850	205	45.8597	1609250	0.691962	209	98.1		360	437.093	78.5852	635	692.022	91.0202
steel 4330	5850	7833	205	45.8	1605765	0.692399	209	98.1		690	433.111	62.7697	860	685.158	79.6696
Nickel Silver	4620	8820	126	40.7484	1111320	0.758674	139	89.6825		250	268.538	92.5849	470	460.485	97.9756
NICKEL SILVER 10%	4760	8600	117	40.936	1006200	0.756002	137	82.906		270	269.761	99.9114	500	462.611	92.5222
Incoloy 825	5820	8140	206	47.3748	1676840	0.674365	219	93.6893		310	365.611	82.0609	690	642.709	93.1462
MONEL	5400	8830	179	47.682	1580570	0.670904	172	96.0894		345	373.533	91.7296	620	657.033	94.0269
Incoloy 925	6950	8080	199	56.156	1607920	0.587641	172	86.4322		815	746.077	91.5432	1172	1269.88	91.6486
Alloy 904L	4000	8000	200	32	1600000	0.907979	172	86		220	227.937	96.3921	490	469.151	95.7452
9 D	5789	8450	154	48.9171	1301300	0.657341	184	80.5195		415	409.054	98.5672	750	720.209	96.0279
1 E	5657	8530	110	48.2542	938300	0.664552	125	86.3636		345	389.249	87.1742	621	685.188	89.6638
A 7	6000	2800	71	16.8	198800	1.36799	64	90.1408		415	424.835	97.6302	487	480.564	98.6607
ALUMINUM 2024	6405	2770	73.1	17.7418	202487	1.32728	76.6	95.212		415	426.901	97.1324	469	464.914	99.1211
Aluminium 2024	6405	2780	72	17.8059	200160	1.32459	77.7	92.0833		415	427.016	97.1046	495	463.847	93.2837
ZIRCALOY-2	4719	6560	99	30.9566	649440	0.92972	116	82.8283		420	450.64	92.7047	520	478.053	91.2255
BRONZE, PHOSPHOR	3500	8860	117	31.01	1036620	0.928583	86	73.5043		425	450.799	93.9298	550	478.855	85.1427
5 B	4096	7370	75	30.1875	552750	0.946409	90	80		434	448.409	96.6799	487	466.747	95.6609
6 C	4375	8400	93	36.75	781200	0.820425	103	89.2473		455	469.833	96.74	607	569.785	93.4685
Silver Nickel	4620	8730	126	40.3326	1099980	0.764665	117	92.8571		410	482.905	82.2183	500	622.994	80.2576
TiC	8270	4938	323	40.8373	1594974	0.757406	255	78.9474		415	484.776	83.1864	450	629.948	71.4344
DUPLEX 2205	5600	7800	200	43.68	1560000	0.718936	182.5	91.25		500	495.351	99.0701	700	666.208	94.9277
CU/NI 80/20	4928	8940	141	44.0563	1260540	0.714131	163	84.3972		450	496.749	89.6113	650	670.626	96.8268
W-3.5Ni-Fe	5040	17494	345	88.1698	6035430	0.399737	359	95.942		621	622.489	99.7601	827	826.589	99.9503
